# Supplementary material for: Reduced Seasonal Coronavirus Antibody Responses in Children Following COVID-19 Mitigation Measures, The Netherlands
Source: MDPI journal article supplement (doi:10.3390/v15010212), 2023-01-12
Supplement: s1 [file s1]

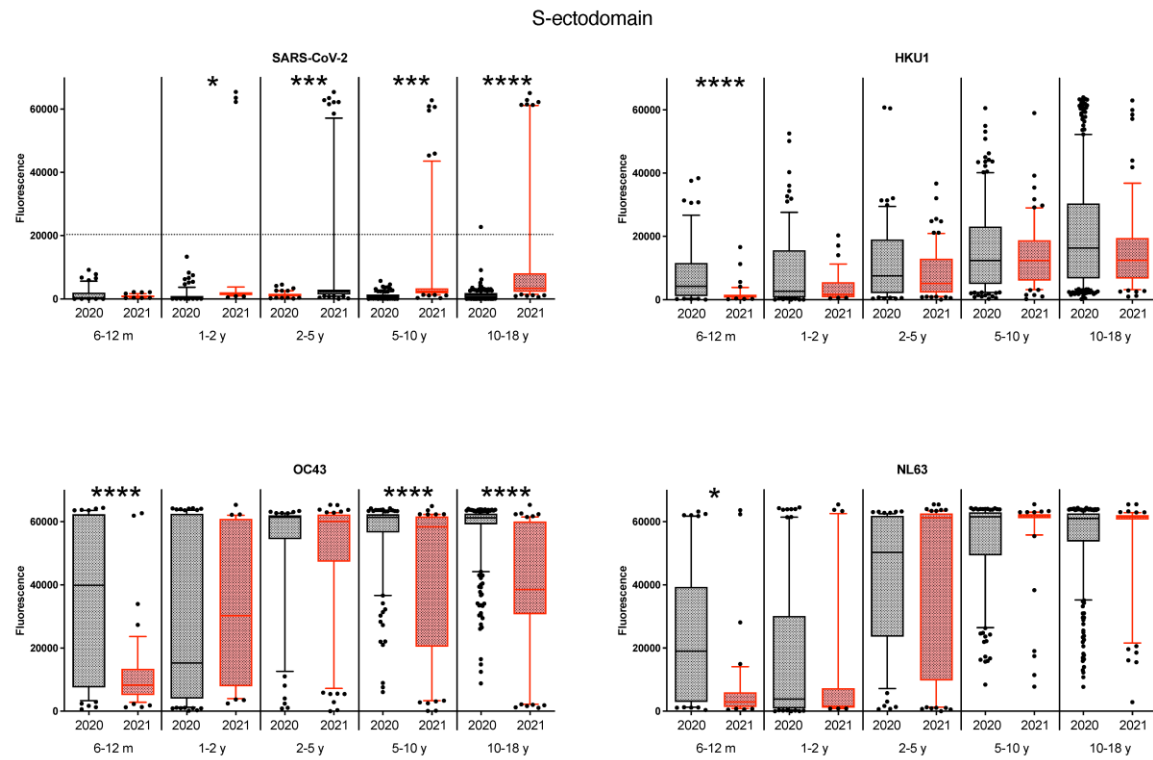

**Figure S1.** Antibody binding to S-ectodomain antigens of SARS-CoV-2, OC43, HKU1 and NL63 seasonal coronaviruses as measured with the ProteinMicroarray.
